# Supplementary material
Source: Springer Nature journal article supplement (https://www.springermedizin.de/resource/supplementary/12889_2013_6291_MOESM3_ESM.pdf/9499826)

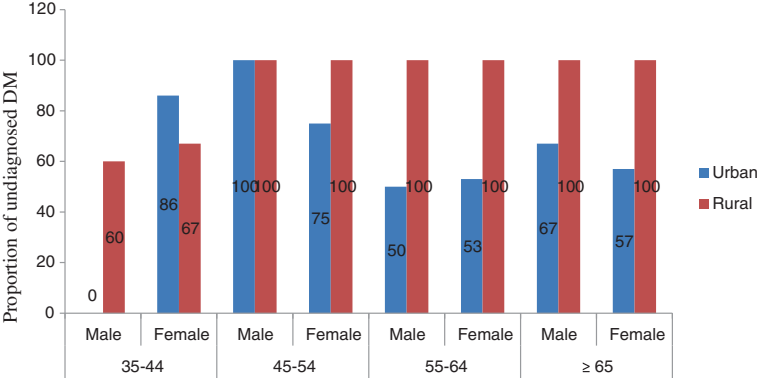

Supplement: MOESM3 [file 9499826]
